# Supplementary material for: Astrocytes respond to a neurotoxic Aβ fragment with state-dependent Ca2+ alteration and multiphasic transmitter release
Source: PubMed Central journal article supplement (PMC7968286; doi:10.1186/s40478-021-01146-1), 2021-03-16
Supplement: 40478_2021_1146_MOESM1_ESM.pdf [file 40478_2021_1146_MOESM1_ESM.pdf]

## Supplementary material

# Astrocytes respond to a neurotoxic A $\beta$ fragment with state-dependent Ca<sup>2+</sup> alteration and multiphasic transmitter release

### Abbreviation list:

2-APB – 2-Aminoethoxydiphenyl borate

A $\beta$  – amyloid  $\beta$

AD – Alzheimer's disease

cAMP – cyclic adenosine monophosphate

CBX - carbenoxolone

CX – connexin

DCPIB –

4-[(2-butyl-6,7-dichloro-2-cyclopentyl-2,3-dihydro-1-oxo-1*H*-inden-5-yl)oxy]butanoic acid

EPAC – exchange protein directly activated by cAMP

ER – endoplasmic reticulum

FRET – fluorescence resonance energy transfer

GLT-1 – glutamate transporter 1

GLAST – glutamate aspartate transporter

GPN – glycyl-L-phenylalanine 2-naphthylamide

mGluR – metabotropic glutamate receptor

MPEP – 2-Methyl-6-(phenylethynyl)pyridine

NCX – sodium calcium exchanger

NPPB – 5-nitro-2-(3-phenylpropylamino) benzoic acid

OGB-1 – Oregon green bapta 1

PMCA – plasma membrane Ca<sup>2+</sup> ATPase

PPADS – pyridoxalphosphate-6-azophenyl-2',4'-disulfonic acid

SOC – store-operated channel

SD – standard deviation

TIRFM – total internal reflection fluorescence microscopy

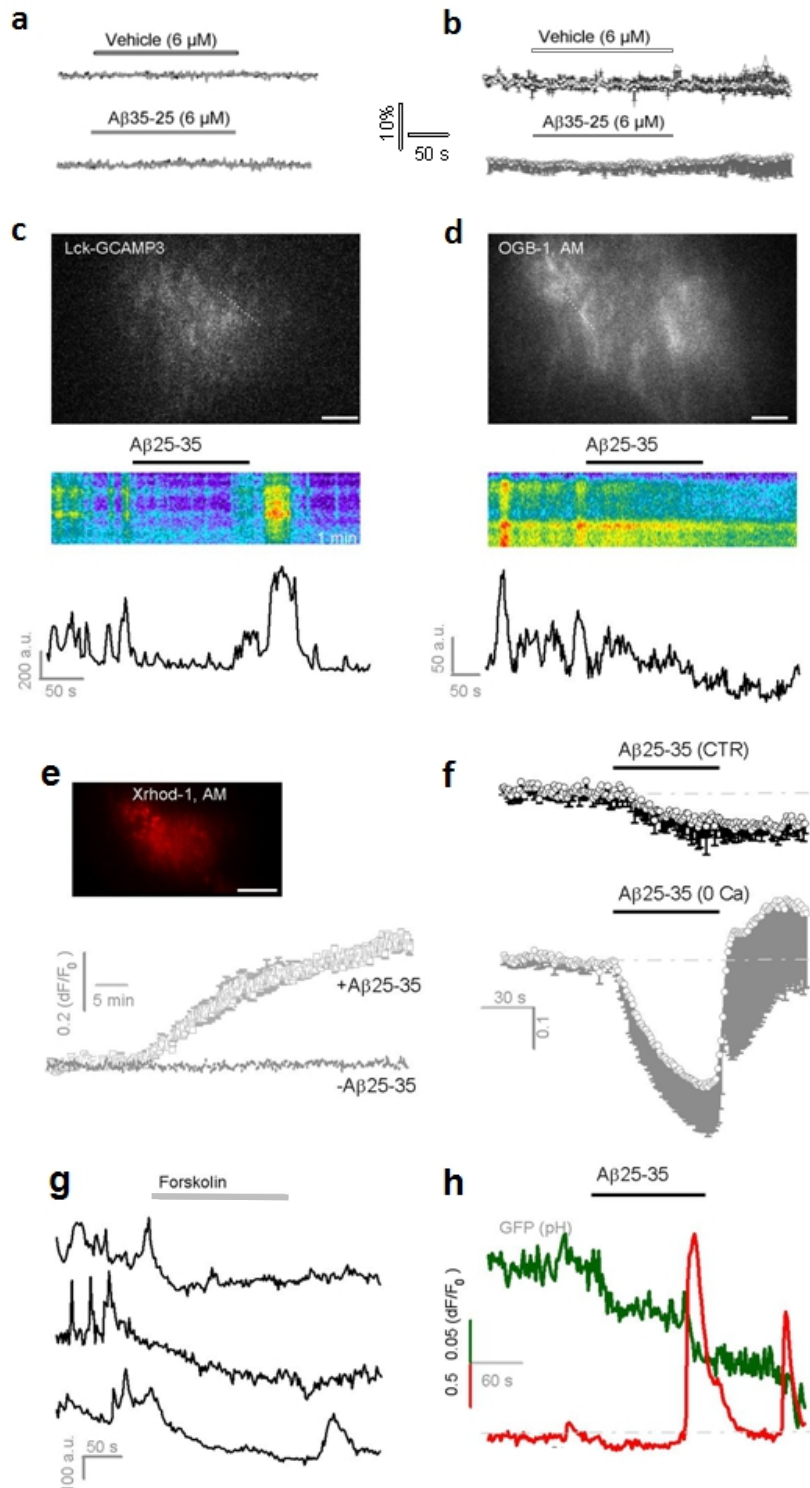

**Fig. S1** Effects of Aβ25-35 on astrocyte Ca<sup>2+</sup> signaling. Cultured astrocytes in basal condition (**a**) and after Aβ preconditioning (**b**; Aβ25-35, 0.5 μM, 2 hr) in response to either vehicle (i.e., equal molar H<sub>2</sub>O) or the reversed peptide Aβ35-25 (n = 7 per condition). (**c-d**) Inhibitory effect of Aβ (6 μM) on spontaneous astrocytic Ca<sup>2+</sup> oscillation. (**e**) Preconditioning with Aβ25-35 (0.5 μM) caused gradual Ca<sup>2+</sup> overload in astrocytes. The chemical Ca<sup>2+</sup> dye

Xrhod-1, AM was used for long-term  $\text{Ca}^{2+}$  imaging ( $n = 8$  cells for each). (f) Removing extracellular  $\text{Ca}^{2+}$  facilitated  $\text{A}\beta_{25-35}$ -caused  $\text{Ca}^{2+}$  diminution ( $n = 9$  for CTR,  $n = 7$  for zero external  $\text{Ca}^{2+}$  condition). (g) Inhibition of spontaneous astrocyte  $\text{Ca}^{2+}$  oscillations by forskolin ( $100 \mu\text{M}$ ). (h) Stepwise decreases in intracellular pH observed in the 'mix' type astrocyte  $\text{Ca}^{2+}$  response, which was evoked by  $\text{A}\beta_{25-35}$  ( $6 \mu\text{M}$ ) in astrocytes after short-term preconditioning ( $\text{A}\beta_{25-35}$   $0.5 \mu\text{M}$ ,  $0.5 \text{ hr}$ ). The red  $\text{Ca}^{2+}$  sensor GECO-R and the pH-sensitive GFP fluorescent protein were co-expressed in cultured astrocytes. During  $\text{A}\beta_{25-35}$  application, the initial small diminution in basal  $\text{Ca}^{2+}$  was likely due to the direct potentiation of PMCA that meanwhile caused  $\text{H}^+$  influx thereby decreasing the GFP fluorescence. The delayed  $\text{Ca}^{2+}$  rise would have also activated PMCA to confine the  $\text{Ca}^{2+}$  elevation, inducing more  $\text{H}^+$  influx to further quench the GFP fluorescence. During the elevation phase, cytosolic  $\text{Ca}^{2+}$  could also be buffered into ER via the sacro/endoplasmic reticulum  $\text{Ca}^{2+}$  ATPase. Scale bars,  $5 \mu\text{m}$ .

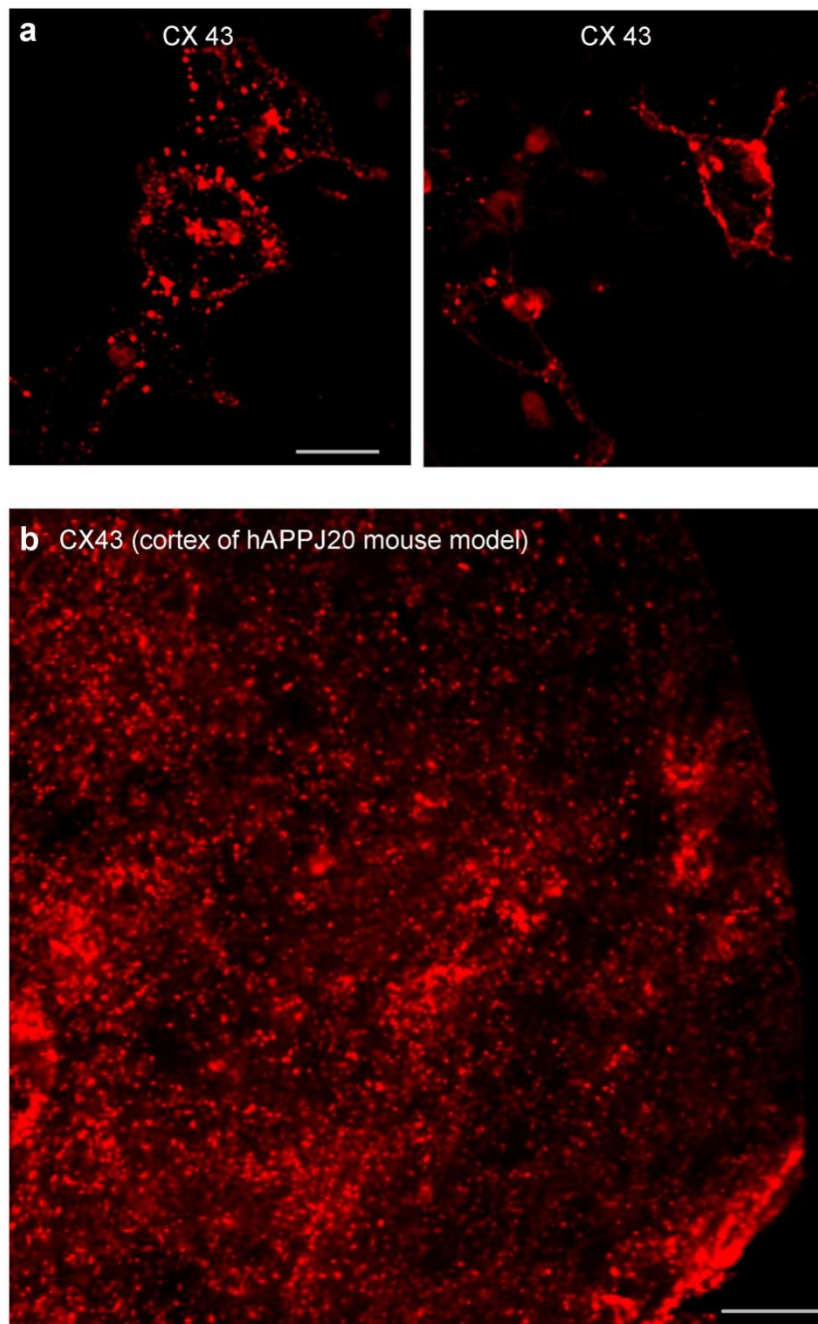

**Fig. S2** Immunostaining of connexin 43 in cultured cortical astrocytes (**a**) and in somatosensory cortex of hAPPJ20 AD mouse (~7 month age; **b**). Scale bars, 20  $\mu$ m.

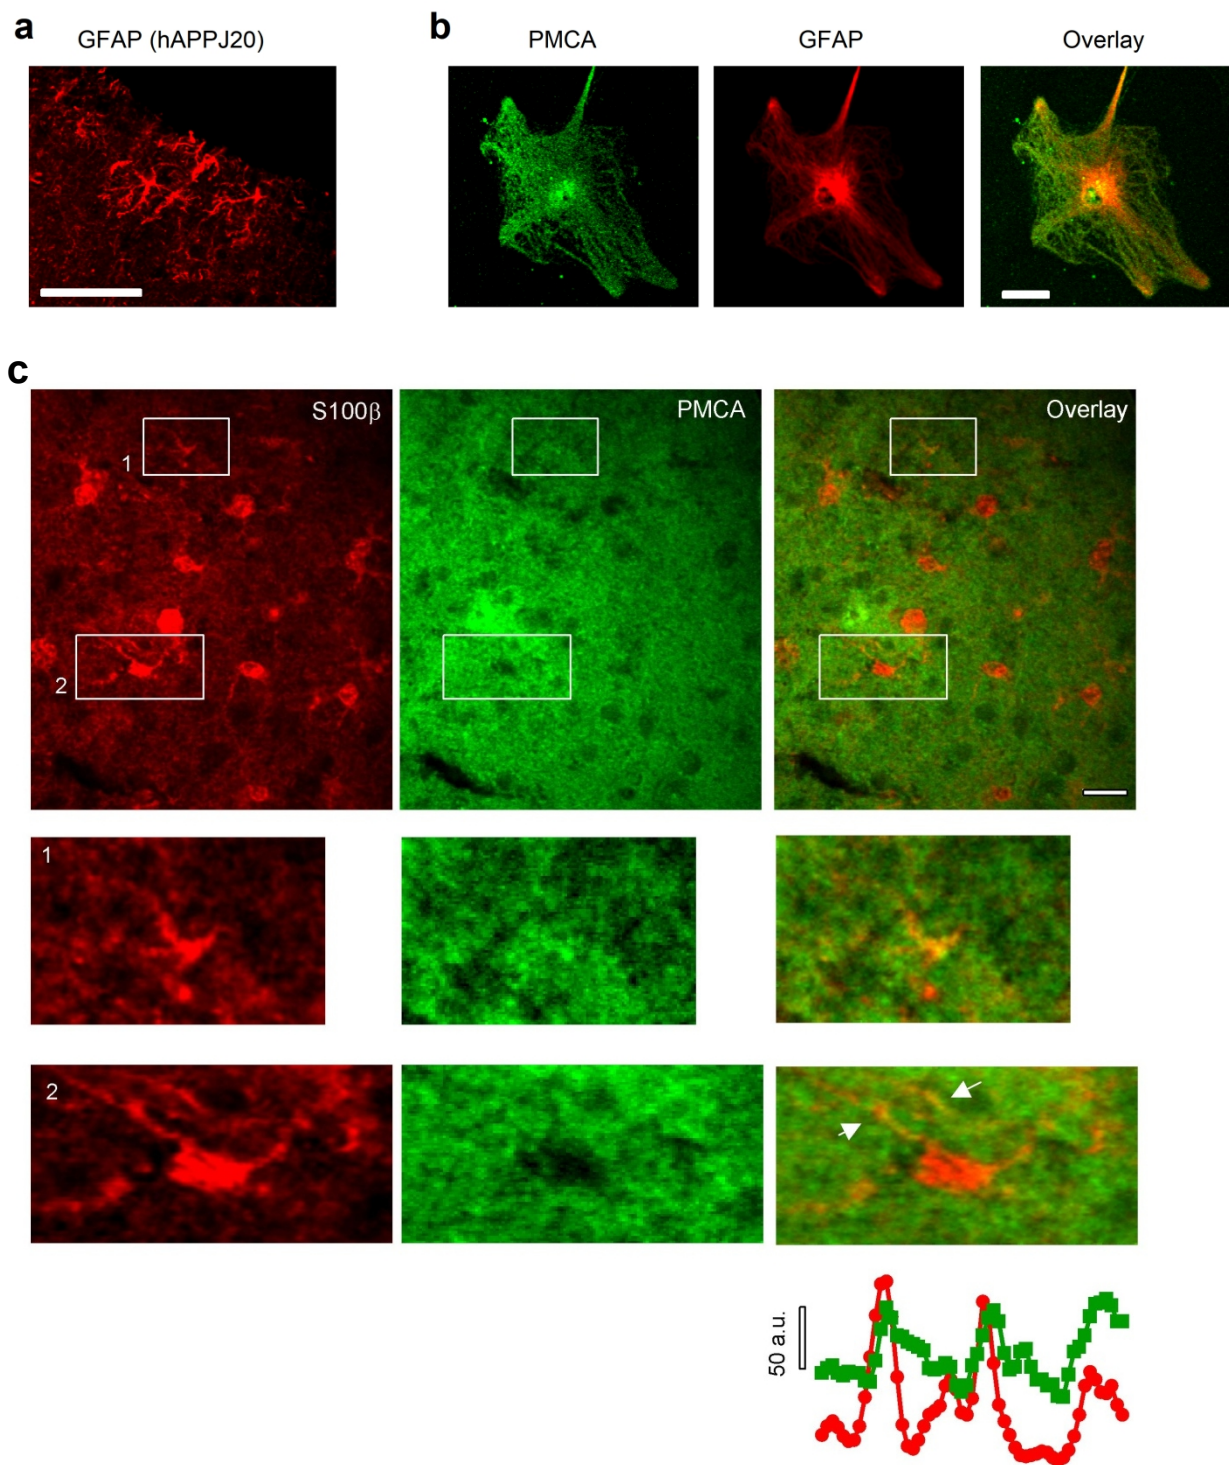

**Fig. S3** Immunostaining of PMCA in astrocytes. (a) GFAP-positive astrocytes observed by immunostaining in the somatosensory cortex of J20 AD mouse model (~7 month old). Scale bar, 50  $\mu$ m. (b) Immunostaining of a pan PMCA antibody against the astrocyte marker GFAP in cultured cortical astrocytes of wild-type mice. Scale bar, 10  $\mu$ m. (c) PMCA

immunostaining in astrocytes in somatosensory cortex of hAPPJ20 AD mouse model. The diffuse staining pattern is consistent with the membranous expression of PMCA. A subpopulation of PMCA labeling was observed to surround S100 $\beta$ -positive astrocytic somata, and present in S100 $\beta$ -identified processes. Mouse age is  $\sim$ 7 month. Scale bar, 20  $\mu$ m.

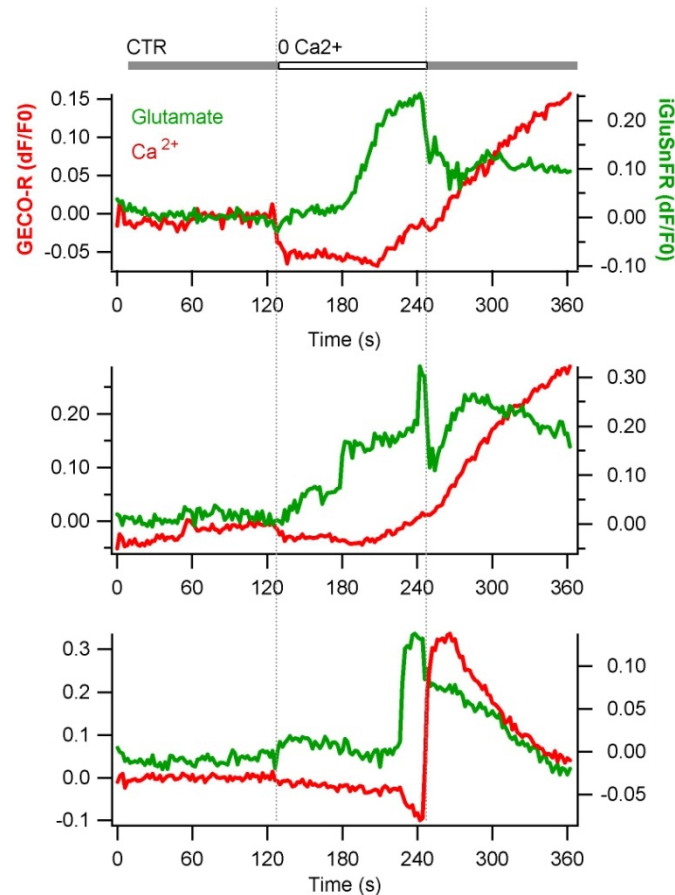

**Fig. S4** Astrocyte glutamate release via opened CX hemichannels. CX hemichannels were opened by  $\text{Ca}^{2+}$ -free solution (open bar). Cytosolic  $\text{Ca}^{2+}$  and glutamate release were simultaneously imaged with TRIFM, in astrocytes co-expressing the red GECO-R and green iGluSnFR sensor. Glutamate release was observed in the absence of  $\text{Ca}^{2+}$  elevation. A diminution in cytosolic  $\text{Ca}^{2+}$  was observed in the phase of 0  $\text{Ca}^{2+}$ , indicating the gradual  $\text{Ca}^{2+}$  efflux due to the reversed ion gradient. Switching back to control solution (1.8 mM  $\text{Ca}^{2+}$ ) re-closed CX hemichannels, causing a transient inhibition for the glutamate release; meanwhile, re-supplying  $\text{Ca}^{2+}$  elevated  $\text{Ca}^{2+}$  levels in the cytosol that then sustained another

phase of glutamate release. This result is in line with the co-existence of Ca<sup>2+</sup>-independent and -dependent glutamate release from astrocytes.

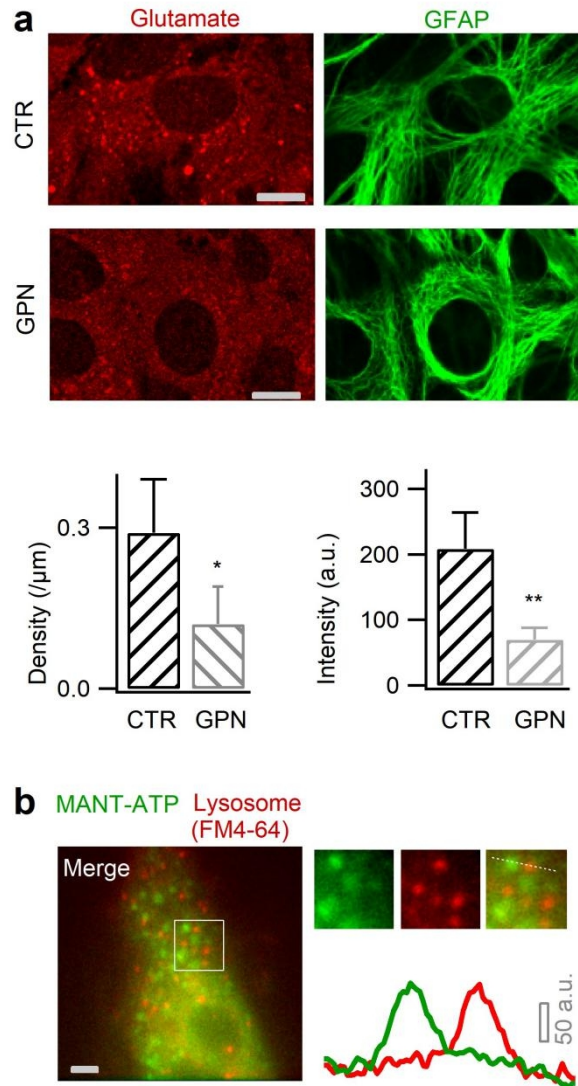

**Fig. S5** Astrocyte lysosomes versus glutamate staining and ATP indicator. **(a)** Glutamate immunostaining in cultured astrocytes concentrated in perinuclear vesicular compartments. Punctate staining was reduced by cathepsin C substrate GPN (200  $\mu\text{M}$ ), a lysosome-disrupting compound (n = 9 - 11 cells per condition). Scale bar, 5  $\mu\text{m}$ . **(b)** Representative spatial distribution of the fluorescent ATP marker MANT-ATP (50  $\mu\text{M}$ , 1 hr) and the lysosomal marker FM4-64 (6.7  $\mu\text{M}$ , 30 min). Scale bar, 10  $\mu\text{m}$ .

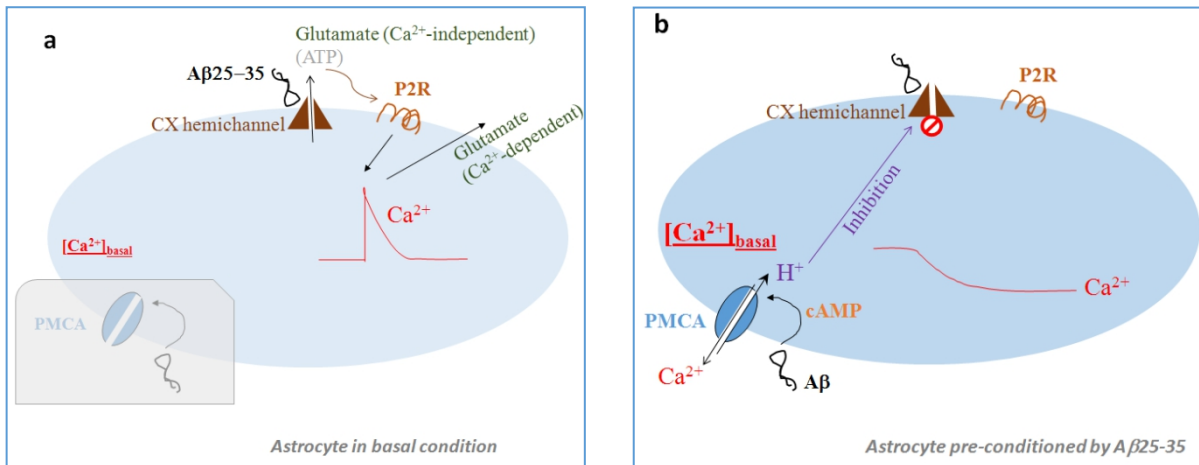

**Fig. S6** Astrocyte response to  $\text{A}\beta_{25-35}$ . **(a)** In astrocytes of basal conditions, cytosolic  $\text{Ca}^{2+}$  is maintained at physiological low level ( $\sim 100$  nM) and PMCA shows no strong reaction to  $\text{A}\beta_{25-35}$ . Meanwhile,  $\text{A}\beta_{25-35}$  acts on CX hemichannels leading to the release of glutamate, and likely ATP, in a  $\text{Ca}^{2+}$ -independent manner. Activation of purinergic P2 receptors then contributes to the intracellular  $\text{Ca}^{2+}$  elevation that triggers the  $\text{Ca}^{2+}$ -dependent release of glutamate.  $\text{A}\beta_{25-35}$  therefore plays an excitatory role in astrocytes in basal conditions. **(b)** Preconditioning of astrocytes with submicromolar  $\text{A}\beta_{25-35}$  peptide leads to gradual intracellular  $\text{Ca}^{2+}$  overload thereby setting a greater driving tendency for  $\text{Ca}^{2+}$  efflux. In this situation, PMCA actively reacts to subsequent  $\text{A}\beta_{25-35}$  stimulation, extruding cytosolic  $\text{Ca}^{2+}$  to the extracellular space therefore lowering the intracellular  $\text{Ca}^{2+}$  level. The coupled  $\text{H}^+$  influx then inhibits the opening of CX hemichannels and the intracellular  $\text{Ca}^{2+}$  elevation.  $\text{A}\beta_{25-35}$  hence exerts an inhibitory effect on the intracellular  $\text{Ca}^{2+}$  level in preconditioned astrocytes.



**Table S1** Antibodies used for fluorescence immunostaining

| Experiments                                                                                           | Primary antibodies                                                                                                                                             | Secondary antibodies                                                                                                              |
|-------------------------------------------------------------------------------------------------------|----------------------------------------------------------------------------------------------------------------------------------------------------------------|-----------------------------------------------------------------------------------------------------------------------------------|
| <b><u>Single staining</u></b>                                                                         |                                                                                                                                                                |                                                                                                                                   |
| GFAP in brain slices of hAPPJ20 AD mouse model (Figure 3i)                                            | Rb GFAP, Agilent/DAKO, Cat N° Z0334, 1/1000                                                                                                                    | Alexa 594 Goat (G) anti-Rb, Invitrogen, Cat N° A11012, 1/1000                                                                     |
| Connexin 43 staining in brain slices of hAPPJ20 AD mouse model and in cultured astrocytes (Figure S2) | Rb Connexin 43, Sigma, Cat N° C6219, 1/1500                                                                                                                    | Alexa 594 G anti-Rb, Invitrogen, Cat N° A11012, 1/1000                                                                            |
| <b><u>Double staining</u></b>                                                                         |                                                                                                                                                                |                                                                                                                                   |
| GFAP and PMCA in cultured astrocytes (Figure 3j)                                                      | Rb GFAP, Agilent/DAKO, Cat N° Z0334, 1/1000<br><br>Mouse (M) pan PMCA ATPase Monoclonal Antibody, ThermoFisher Scientific, Cat N° MA3-914, 1/500               | Alexa 594 Goat (G) anti-Rb, Invitrogen, Cat N° A11012, 1/1000<br><br>Alexa 488 G anti M IgG2A, Invitrogen, Cat N° A-21131, 1/1000 |
| S100 $\beta$ and PMCA co-staining in the cortex of J20 AD mouse (Figure S3)                           | Rb monoclonal S100 $\beta$ , Abcam, Cat N° ab52642, 1/500<br><br>Mouse (M) pan PMCA ATPase Monoclonal Antibody, ThermoFisher Scientific, Cat N° MA3-914, 1/500 | Alexa 594 G anti-Rb, Invitrogen, Cat N° A11012, 1/1000<br><br>Alexa 488 G anti M IgG2A, Invitrogen, cat N°A-21131, 1/1000         |

**Table S2** Combinations of excitation wavelengths and filters for TIRFM imaging

| Fluorophore                 | Excitation laser line (nm) | Dichroic filter (nm)        | Emission filter (nm)           |
|-----------------------------|----------------------------|-----------------------------|--------------------------------|
| EGFP, pHluorin              | 488                        | 500LP or PolyX <sup>§</sup> | 535(50)BP                      |
| GECO-R                      | 568                        | PolyX <sup>§</sup>          | 600LP                          |
| GFP(nd)-EPAC1(dDEP)-mCherry | 488                        | PolyX <sup>§</sup>          | 535(50)&600LP <sup>§</sup>     |
| OGB-1                       | 488                        | PolyX <sup>§</sup>          | 535(50)BP                      |
| OGB-1 and FM4-64            | 488                        | PolyX <sup>§</sup>          | 535(50)&675(50)BP <sup>§</sup> |
| Xrhod-1                     | 568                        | PolyX <sup>§</sup>          | 600LP or 615(45)BP             |

<sup>§</sup>PolyX – custom dual dichroic mirror with 488/568/NIR reflection bands and low ripple high-transmission elsewhere (AHF Analysentechnik).

<sup>§</sup>denotes filters for simultaneous view with a custom dual-view device.
